# Supplementary material for: Talin2-mediated traction force drives matrix degradation and cell invasion
Source: Oxford University Press journal article supplement (doi:10.1242/jcs.185959), 2016-10-01
Supplement: jcs185959supp.pdf [file jcs185959supp.pdf]

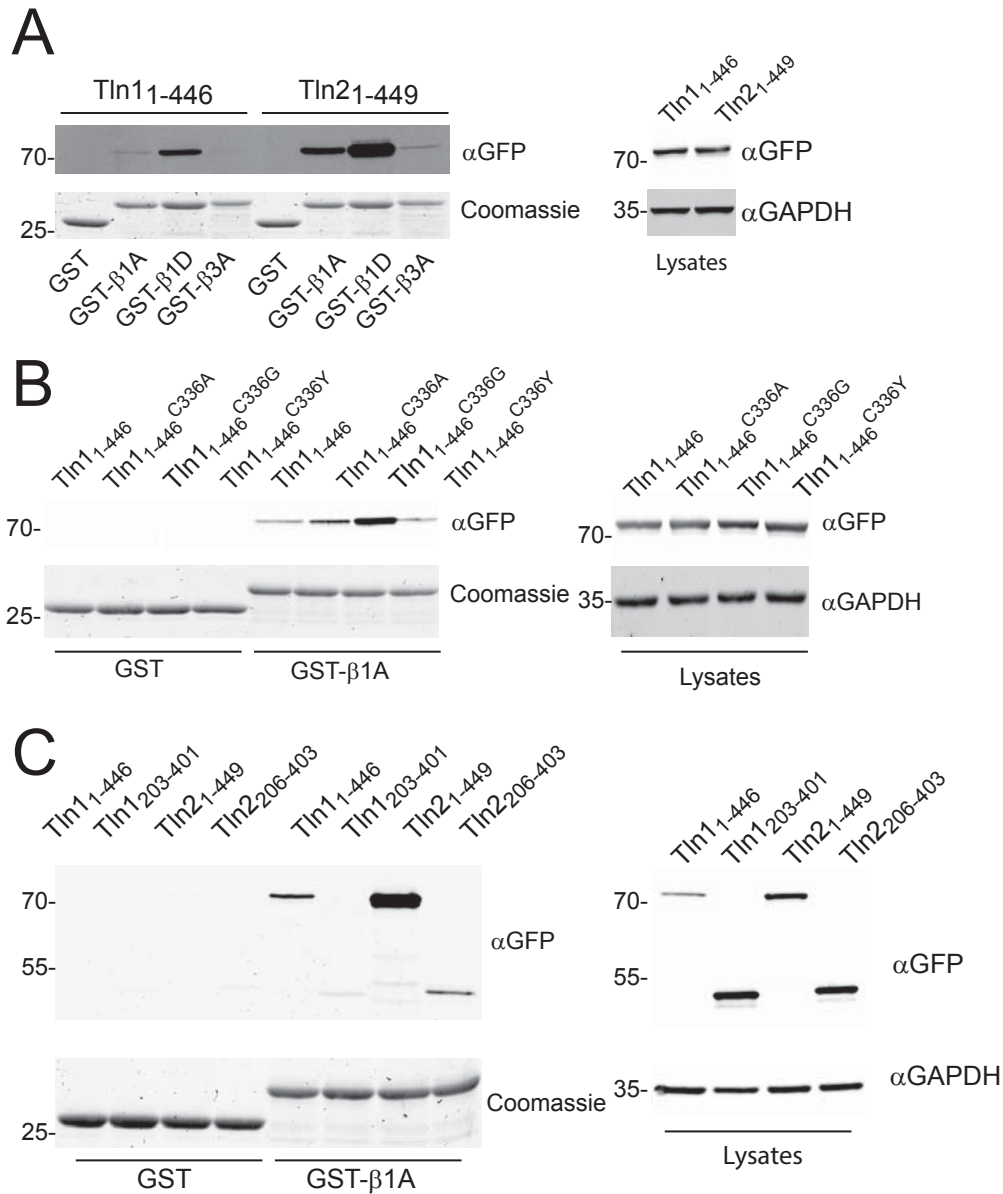

**Supplementary Fig. S1. Interaction of talin1, talin2 and mutants with integrin β1A, β1D and β3A tails.**

**A.** Binding of talin1<sub>1-446</sub> and talin2<sub>1-449</sub> to immobilized GST-β1A, -β1D and -β3A. CHO-K1 cells were transiently transfected with EGFP-talin1<sub>1-446</sub> and -talin2<sub>1-449</sub>, respectively. Cell lysates were incubated with glutathione-agarose beads preloaded with GST-β1A, -β1D and -β3A, respectively. The binding was determined by Western blotting using an anti-GFP antibody. **B.** Binding of talin1<sub>1-446</sub>, talin1<sub>1-446</sub><sup>C336A</sup>, talin1<sub>1-446</sub><sup>C336G</sup>, and talin1<sub>1-446</sub><sup>C336Y</sup> to GST-β1A. **C.** Binding of EGFP-talin1<sub>1-446</sub>, talin1<sub>203-401</sub>, talin2<sub>1-449</sub> and talin2<sub>206-403</sub> to immobilized GST and GST-β1A tails. The interaction was detected by immunoblotting with an anti-GFP antibody.

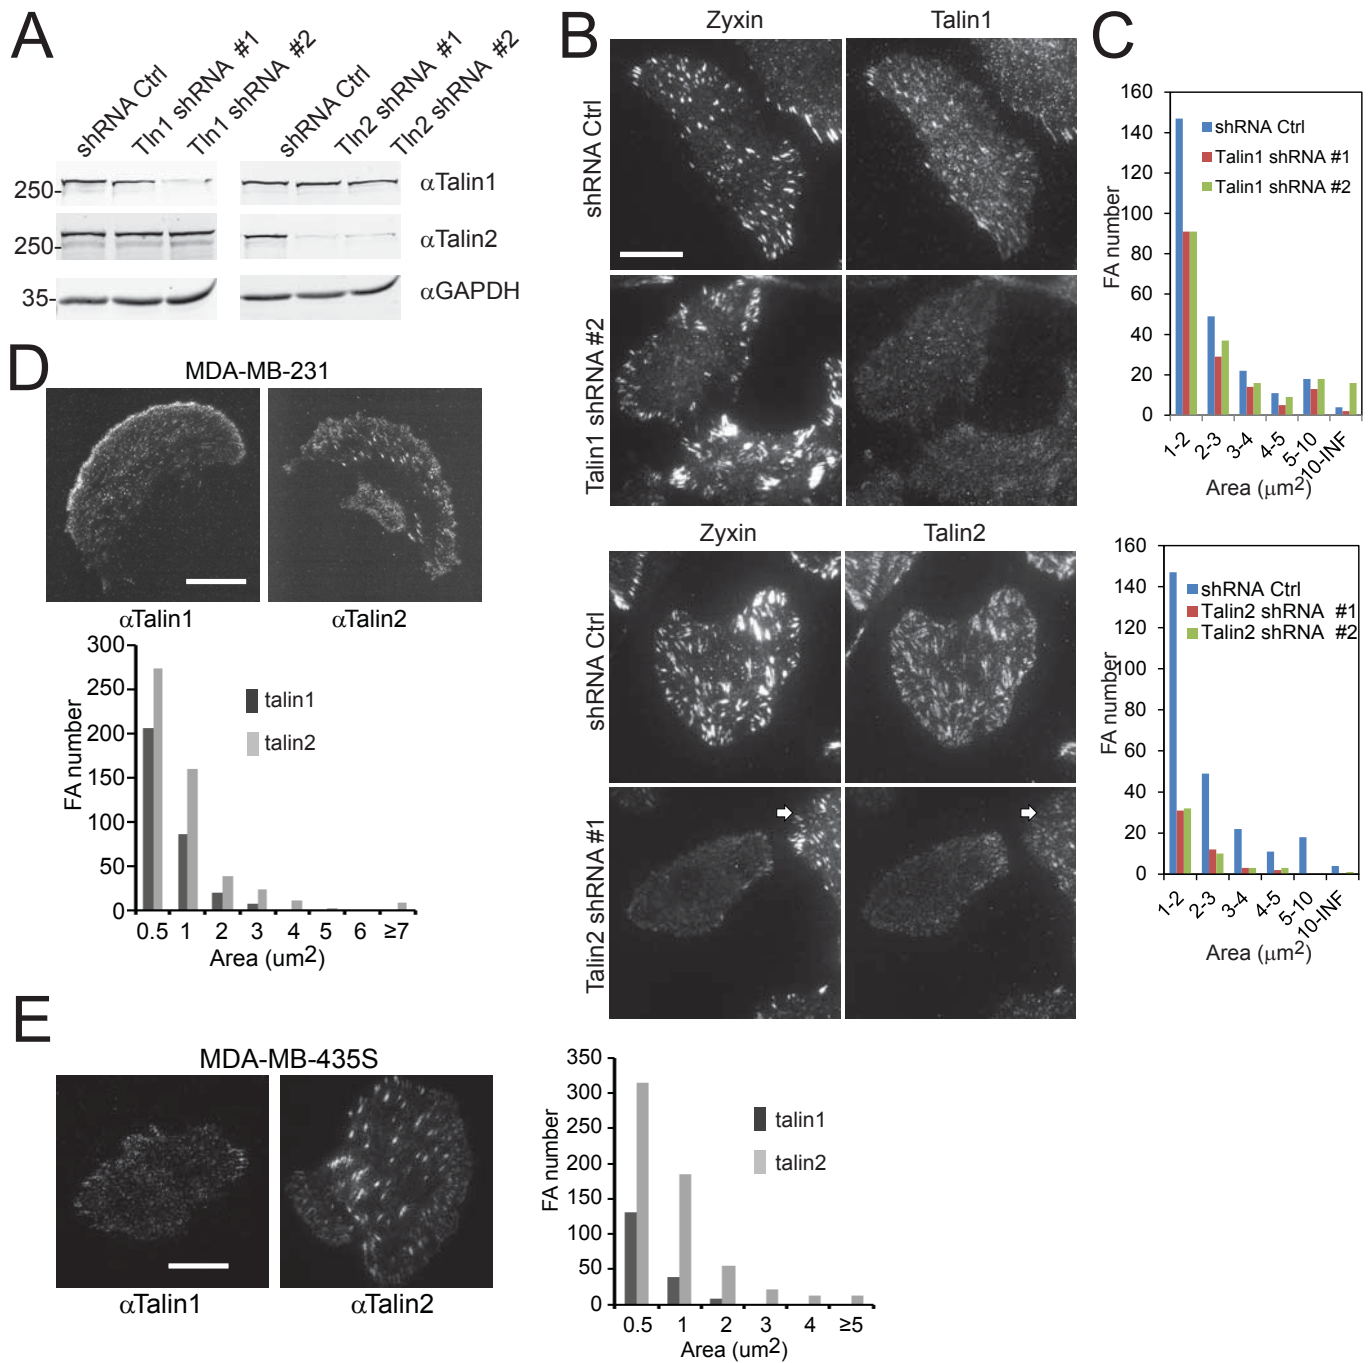

**Supplementary Fig. S2. Talin1 is required for small FA formation, whereas talin2 is responsible for larger FA assembly.**

**A.** The levels of endogenous talin1 and talin2 in talin1 or talin2-depleted U2 OS cells. **B.** The distribution of zyxin and talin1 (or talin2) in talin1- or talin2-depleted U2 OS cells. Talin1 or talin2-depleted cells were plated on fibronectin (5  $\mu\text{g}/\text{ml}$ ) for 4 h, fixed and co-stained for talin1 (or talin2) and zyxin. Zyxin and talin images were acquired by TIRF microscopy. Arrows point to a cell with talin2 partial knockdown. Scale bar, 20  $\mu\text{m}$ . **C.** Area distribution of FAs in talin1- (Left) and talin2- (Right) depleted U2 OS cells was analyzed using Nis-Elements. For each group, FAs from 20 cells were analyzed. Data are averages from 2 independent experiments. **D, E.** Talin1 and talin2 area distribution in MDA-MB-231 and MDA-MB-435S cells. Cells were plated on fibronectin and stained for talin1 or talin2. The size and area distribution of talin1 and talin2 was analyzed using Nis-Elements. Scale bar, 20  $\mu\text{m}$ .

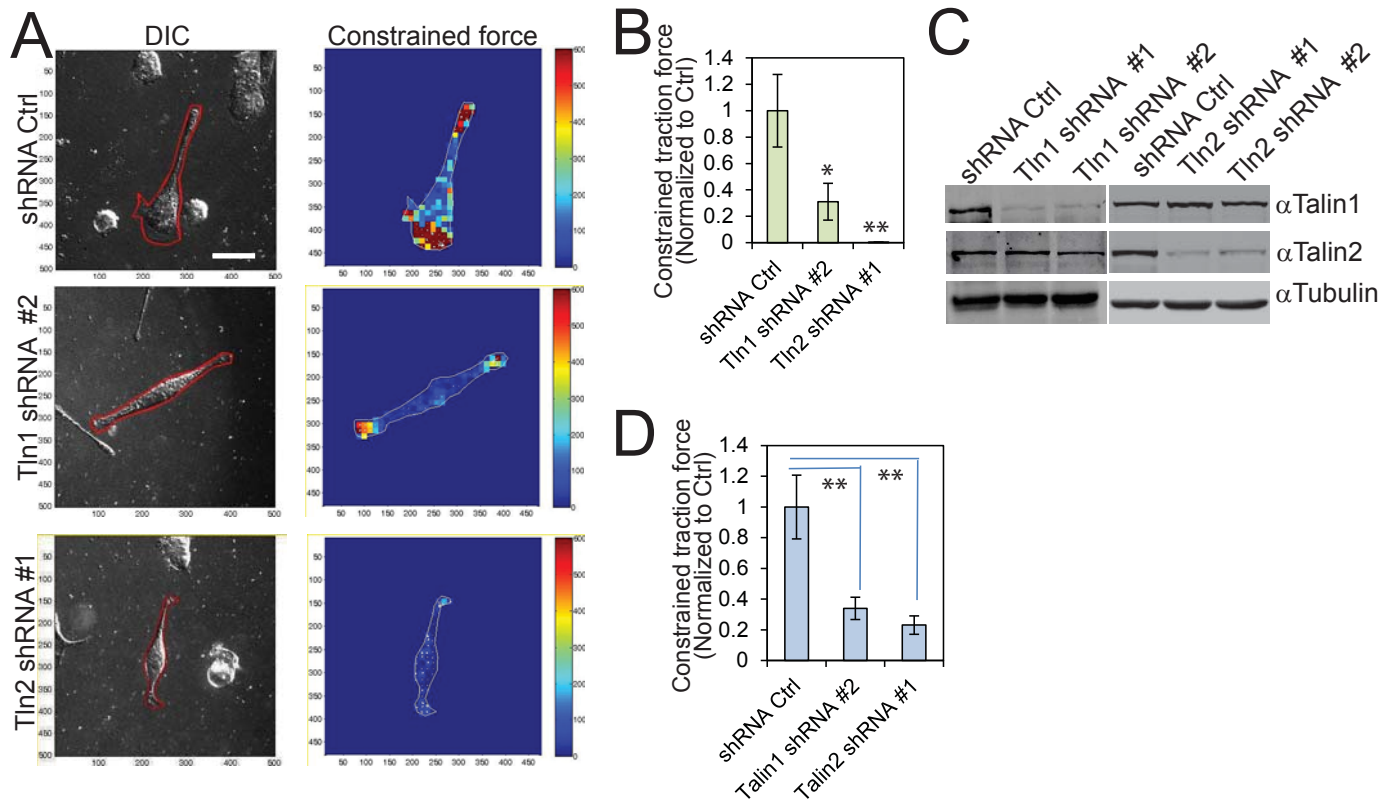

**Supplementary Fig. S3. The role of talin1 and talin2 in traction force production.** **A.** Depletion of talin2 abolished traction force generation in U2 OS cells. Scale bar, 30  $\mu$ m. **B.** Quantitative constrained traction force in U2 OS cells that express shRNA control, talin1 or talin2 shRNA. Data are presented as mean  $\pm$  SEM from more than 30 cells. **C.** The levels of endogenous talin1 and talin2 in talin1 or talin2-depleted MDA-MB-231 cells. **D.** Depletion of either talin1 or talin2 inhibited traction force generation in MDA-MB231 cells. Data are presented as mean  $\pm$  SEM from more than 30 cells. \* $p$ <0.05, \*\* $P$ <0.01.

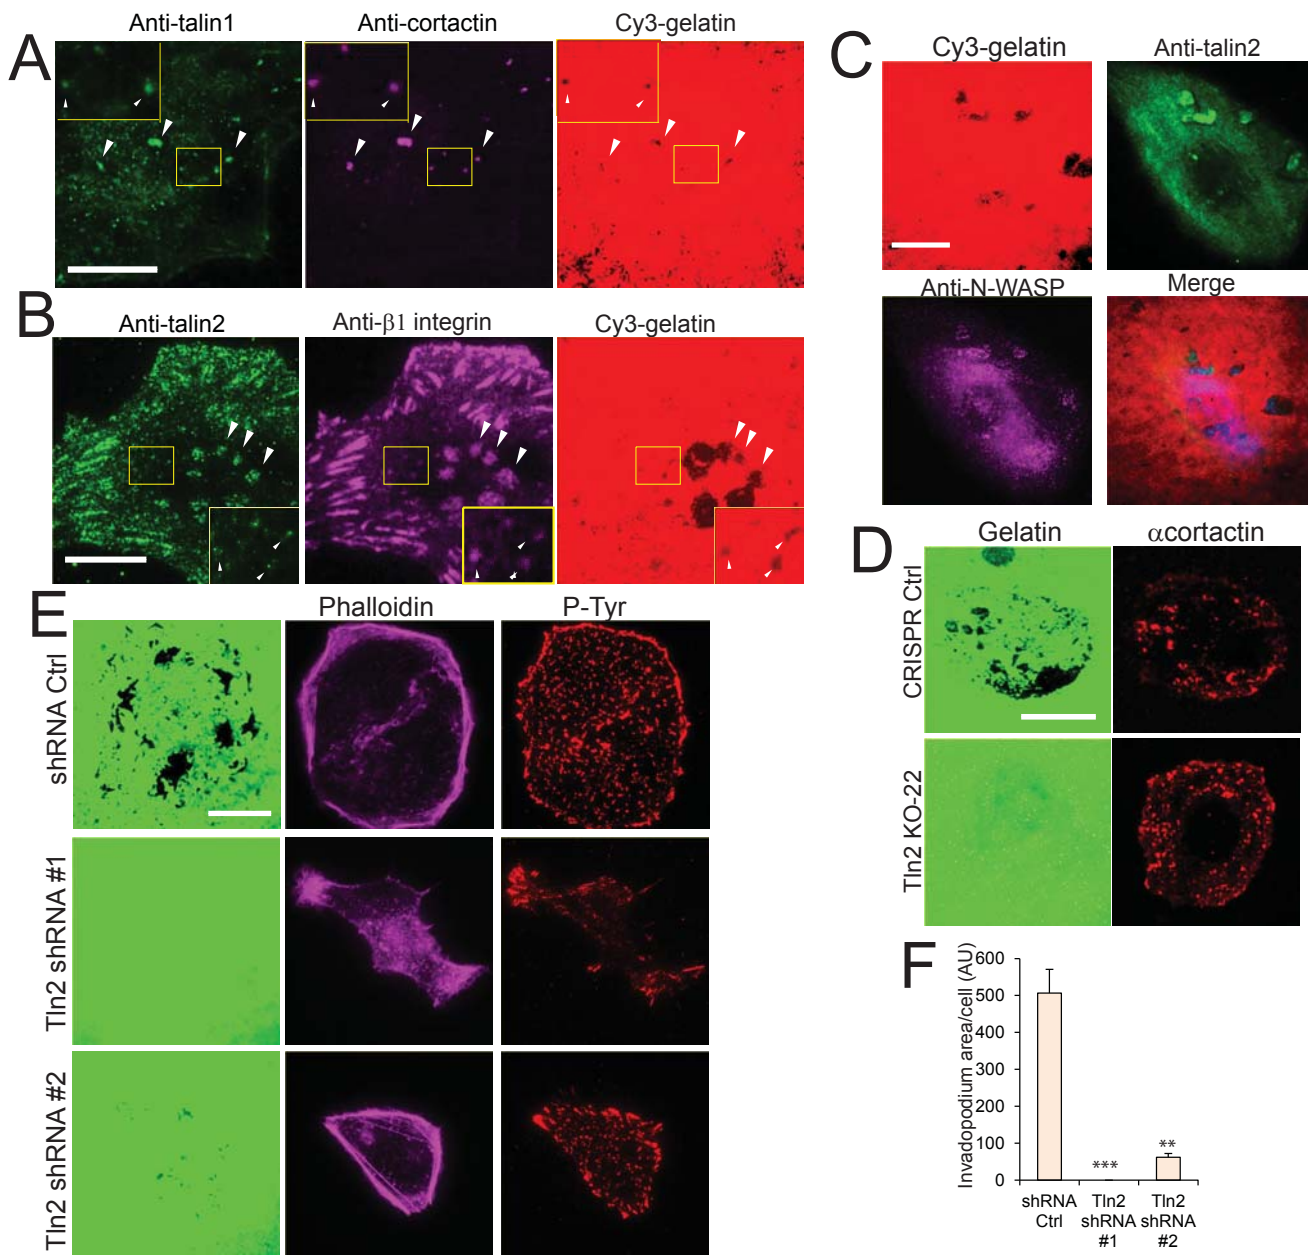

**Supplementary Fig. S4. The role of talin in invadopodium development.** **A.** MDA-MB-231 cells were cultured on immobilized Cy3-gelatin on glass-bottom dishes, fixed, stained for talin1 plus cortactin. Arrow heads point to co-localized spots. Insets show magnified invadopodia in the box. Scale Bars: 20  $\mu$ m. **B.** U2 OS cells were cultured on immobilized Cy3-gelatin on glass-bottom dishes, fixed, stained for talin2 plus  $\beta$ 1 integrin. Arrow heads point to co-localized spots. Scale Bars: 20  $\mu$ m. **C.** U2 OS cells were cultured on immobilized Cy3-gelatin, stained for talin2 and N-WASP. Scale bar, 20  $\mu$ m. **D.** Talin2-null U2 OS cells were cultured on immobilized Alexa488-gelatin, stained for cortactin, using CRISPR vector cells as a control. Scale bar, 20  $\mu$ m. **E.** U2 OS cells that express shRNA control, talin2 shRNA #1 or #2 were cultured on Alexa488-gelatin immobilized on glass-bottom dishes, fixed and stained with Alexa 647-phalloidin and anti-phospho-Tyrosine antibody. Scale bar, 20  $\mu$ m. Data are presented as mean  $\pm$  SEM of 3 independent experiments. \*\*P<0.01, \*\*\*P < 0.001.
